# Supplementary material for: Sperm DNA damage causes genomic instability in early embryonic development
Source: PubMed Central journal article supplement — Sci Adv. 2020 Apr 15;6(16):eaaz7602. doi: 10.1126/sciadv.aaz7602 (PMC7159919; doi:10.1126/sciadv.aaz7602), 2020-04-15
Supplement: aaz7602_SM.pdf [file aaz7602_SM.pdf]

[advances.sciencemag.org/cgi/content/full/6/16/eaaz7602/DC1](https://advances.sciencemag.org/cgi/content/full/6/16/eaaz7602/DC1)

## Supplementary Materials for

### **Sperm DNA damage causes genomic instability in early embryonic development**

Sjors Middelkamp, Helena T. A. van Tol, Diana C. J. Spierings, Sander Boymans, Victor Guryev, Bernard A. J. Roelen, Peter M. Lansdorp, Edwin Cuppen\*, Ewart W. Kuijk

\*Corresponding author. Email: [ecuppen@umcutrecht.nl](mailto:ecuppen@umcutrecht.nl)

Published 15 April 2020, *Sci. Adv.* **6**, eaaz7602 (2020)  
DOI: [10.1126/sciadv.aaz7602](https://doi.org/10.1126/sciadv.aaz7602)

**The PDF file includes:**

**Other Supplementary Material for this manuscript includes the following:**

(available at [advances.sciencemag.org/cgi/content/full/6/16/eaaz7602/DC1](https://advances.sciencemag.org/cgi/content/full/6/16/eaaz7602/DC1))

Table S1 (Microsoft Excel format).
